# Supplementary material for: Highly Sensitive Determination of Antibiotic Residues in Aquatic Products by High-Performance Liquid Chromatography–Tandem Mass Spectrometry
Source: MDPI journal article supplement (doi:10.3390/antibiotics11101427), 2022-10-17
Supplement: s1 [file s1]

## Supplementary Materials

# Highly Sensitive Determination of Antibiotics Residues in Aquatic Products by High-Performance Liquid Chromatography–Tandem Mass Spectrometry

Hongli Ye <sup>1,2</sup>, Siman Li <sup>1</sup>, Yinfeng Xi <sup>1,2</sup>, Yongfu Shi <sup>1</sup>, Xiaorui Shang <sup>1,3</sup>, and Dongmei Huang <sup>1,\*</sup>

<sup>1</sup> Laboratory of Aquatic Product Quality, Safety and Processing, East China Sea Fisheries Research Institute, Chinese Academy of Fishery Sciences, Shanghai, 200090, China

<sup>2</sup> Key Laboratory of Control of Safety and Quality for Aquatic Product, Ministry of Agriculture and Rural Affairs, Beijing, 100141, China;

<sup>3</sup> College of Food Sciences and Technology, Shanghai Ocean University, Shanghai 201306, China;

\* Correspondence: huangdm@ecsf.ac.cn (D. H.)

**Citation:** Ye, H.; Li, S.; Xi, Y.; Shi, Y.; Shang, X.; Huang, D. Highly Sensitive Determination of Antibiotics Residues in Aquatic Products by High-Performance Liquid Chromatography–Tandem Mass Spectrometry. *Antibiotics* **2022**, *11*, 1427. <https://doi.org/10.3390/antibiotics11101427>

Academic Editors: Yongning Wu and Carlos M. Franco

Received: 15 August 2022

Accepted: 14 October 2022

Published: 17 October 2022

**Publisher's Note:** MDPI stays neutral with regard to jurisdictional issues. MDPI is not responsible for the content of any maps and illustrations included in the article.

**Copyright:** © 2022 by the authors. Submitted for possible open access publication under the terms and conditions of the Creative Commons Attribution (CC BY) license (<https://creativecommons.org/licenses/by/4.0/>).

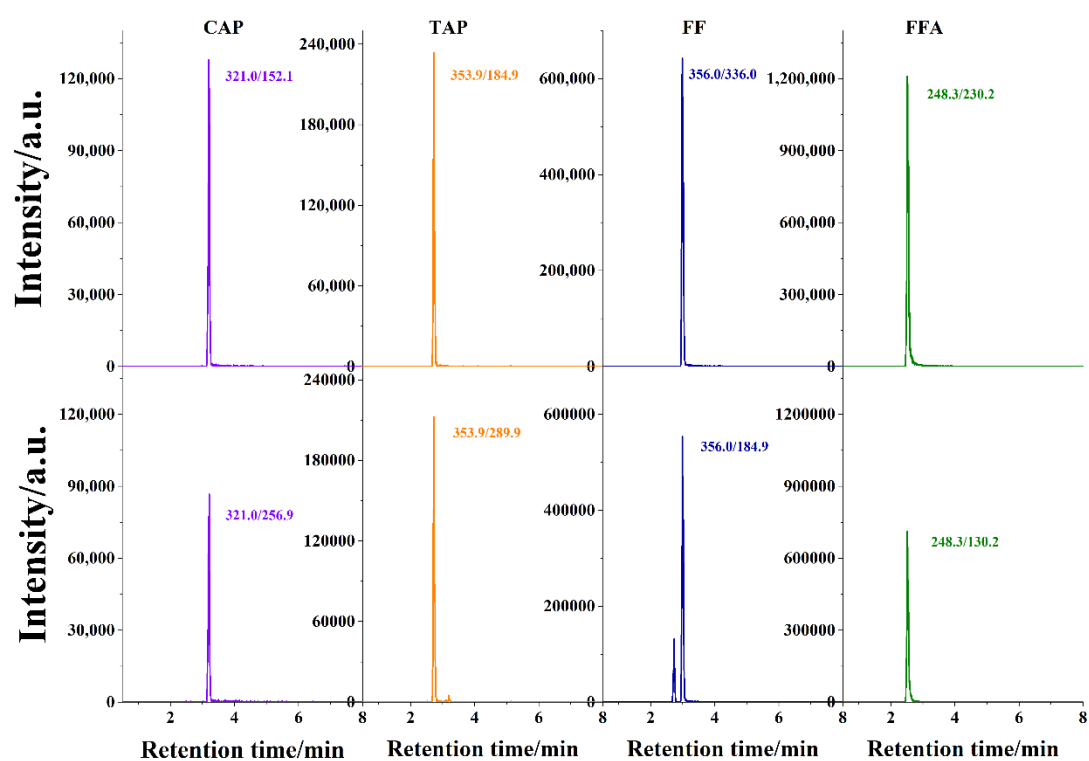

Figure S1. The selective product ions chromatograms of 25 ng/mL CAP, TAP, FF and FFA.

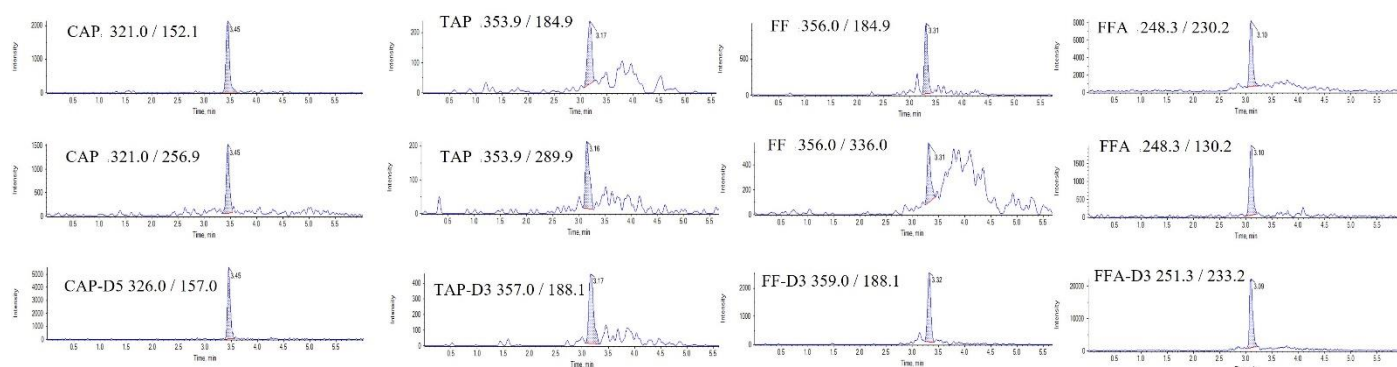

**Figure S2.** Q3 ions fragments of the 0.1 µg/L amphenicols standard solution detected by the optimal conditions.

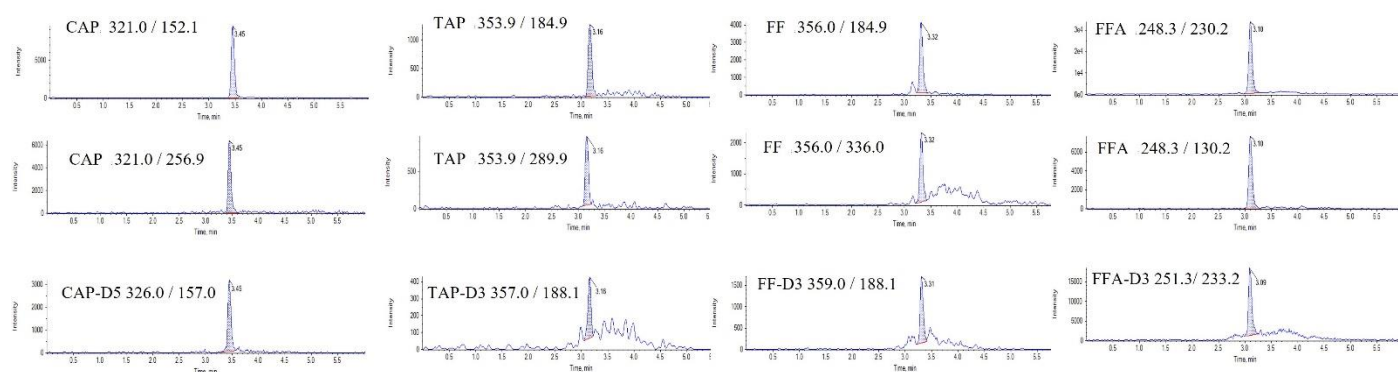

Figure S3. Q3 ions fragments of the spiked 0.5 µg/kg amphenicols in *Carassius auratus*.

**Table S1.** The determination results of amphenicols in 58 positive aquatic products.

| Number | Species | Aquatic products                   | Measurement (µg/kg) |             |              |             |
|--------|---------|------------------------------------|---------------------|-------------|--------------|-------------|
|        |         |                                    | CAP                 | TAP         | FF           | FFA         |
| 1      | Fish    | <i>Silurus asotus</i>              | N.D.                | N.D.        | 0.171±0.021  | N.D.        |
| 2      |         | <i>Parabramis pekinensis</i>       | N.D.                | 1.81±0.083  | 0.160±0.012  | N.D.        |
| 3      |         | <i>Ophiocephalus argus</i>         | N.D.                | N.D.        | 0.475±0.014  | N.D.        |
| 4      |         | <i>Hypophthalmichthys molitrix</i> | N.D.                | 0.977±0.057 | N.D.         | N.D.        |
| 5      |         | <i>Lateolabrax japonicus</i>       | N.D.                | N.D.        | 0.113±0.006  | 0.261±0.015 |
| 6      |         | <i>Larimichthys crocea</i>         | N.D.                | N.D.        | 0.0615±0.001 | N.D.        |
| 7      |         | <i>Anguilla japonica</i>           | N.D.                | 0.834±0.015 | N.D.         | N.D.        |
| 8      |         | <i>Monopterus albus</i>            | N.D.                | N.D.        | 4.56±0.021   | N.D.        |
| 9      |         | <i>Carassius auratus</i>           | N.D.                | N.D.        | 0.137±0.01   | N.D.        |
| 10     |         | <i>Lateolabrax japonicus</i>       | N.D.                | N.D.        | 2.94         | 47.8        |
| 11     |         | <i>Ophiocephalus argus</i>         | N.D.                | N.D.        | N.D.         | 43.1        |
| 12     |         | <i>Ophiocephalus argus</i>         | N.D.                | N.D.        | N.D.         | 9.81        |
| 13     |         | <i>Aristichthys nobilis</i>        | N.D.                | N.D.        | 50.0         | N.D.        |
| 14     |         | <i>Ophiocephalus argus</i>         | N.D.                | N.D.        | N.D.         | 27.0        |
| 15     |         | <i>Aristichthys nobilis</i>        | N.D.                | N.D.        | N.D.         | 14.1        |
| 16     |         | <i>Scophthalmus maximus</i>        | N.D.                | N.D.        | 15.3         | 4.97        |
| 17     |         | <i>Ophiocephalus argus</i>         | N.D.                | N.D.        | N.D.         | 9.13        |
| 18     |         | <i>Parabramis pekinensis</i>       | N.D.                | N.D.        | 6.07         | N.D.        |
| 19     |         | <i>Lateolabrax japonicus</i>       | N.D.                | N.D.        | 60.7         | N.D.        |
| 20     |         | <i>Ophiocephalus argus</i>         | N.D.                | N.D.        | N.D.         | 97.2        |
| 21     |         | <i>Lateolabrax japonicus</i>       | N.D.                | N.D.        | N.D.         | 59.2        |
| 22     |         | <i>Ophiocephalus argus</i>         | N.D.                | N.D.        | N.D.         | 46.1        |
| 23     |         | <i>Monopterus albus</i>            | N.D.                | N.D.        | N.D.         | 243         |
| 24     |         | <i>Monopterus albus</i>            | N.D.                | N.D.        | N.D.         | 149         |
| 25     |         | <i>Monopterus albus</i>            | N.D.                | N.D.        | N.D.         | 78.3        |
| 26     |         | <i>Monopterus albus</i>            | N.D.                | N.D.        | N.D.         | 50.9        |
| 27     |         | <i>Monopterus albus</i>            | N.D.                | N.D.        | 36.3         | N.D.        |
| 28     |         | <i>Ophiocephalus argus</i>         | N.D.                | N.D.        | N.D.         | 106         |
| 29     |         | <i>Lateolabrax japonicus</i>       | N.D.                | N.D.        | N.D.         | 13.1        |
| 30     |         | <i>Monopterus albus</i>            | N.D.                | N.D.        | N.D.         | 89.0        |
| 31     |         | <i>Scophthalmus maximus</i>        | N.D.                | N.D.        | 44.2         | N.D.        |
| 32     |         | <i>Parabramis pekinensis</i>       | N.D.                | N.D.        | 3.10         | N.D.        |
| 33     |         | <i>Cyprinus carpio</i>             | N.D.                | N.D.        | 31.2         | N.D.        |
| 34     |         | <i>Lateolabrax japonicus</i>       | N.D.                | N.D.        | N.D.         | 14.2        |
| 35     |         | <i>Cyprinus carpio</i>             | N.D.                | N.D.        | N.D.         | 10.1        |
| 36     |         | <i>Cyprinus carpio</i>             | N.D.                | N.D.        | N.D.         | 18.8        |
| 37     | shrimp  | <i>Procambarus clarkii</i>         | N.D.                | N.D.        | 0.176±0.012  | N.D.        |
| 38     |         | <i>Macrobrachium rosenbergii</i>   | N.D.                | N.D.        | 1.96±0.029   | N.D.        |
| 39     |         | <i>Litopenaeus vannamei</i>        | N.D.                | N.D.        | 0.443±0.037  | N.D.        |

|    |               |                                |      |      |             |      |
|----|---------------|--------------------------------|------|------|-------------|------|
| 40 |               | <i>Litopenaeus vannamei</i>    | N.D. | N.D. | 2.13        | N.D. |
| 41 | crab          | <i>Eriocheir sinensis</i>      | N.D. | N.D. | 0.147±0.009 | N.D. |
| 42 | shellfish     | <i>Sinonovacula constricta</i> | N.D. | N.D. | 0.618±0.004 | N.D. |
| 43 |               | <i>Pelodiscus sinensis</i>     | N.D. | N.D. | 6.75        | N.D. |
| 44 |               | <i>Pelodiscus sinensis</i>     | N.D. | N.D. | 107         | N.D. |
| 45 |               | <i>Pelodiscus sinensis</i>     | N.D. | N.D. | 9.49        | N.D. |
| 46 |               | <i>Pelodiscus sinensis</i>     | N.D. | N.D. | 11.8        | N.D. |
| 47 |               | <i>Pelodiscus sinensis</i>     | N.D. | N.D. | 12.5        | N.D. |
| 48 |               | <i>Pelodiscus sinensis</i>     | N.D. | N.D. | N.D.        | 18.2 |
| 49 |               | <i>Pelodiscus sinensis</i>     | N.D. | N.D. | N.D.        | 118  |
| 50 | other aquatic | <i>Pelodiscus sinensis</i>     | N.D. | N.D. | N.D.        | 23.4 |
| 51 | samples       | <i>Pelodiscus sinensis</i>     | N.D. | N.D. | N.D.        | 7.79 |
| 52 |               | <i>Pelodiscus sinensis</i>     | N.D. | N.D. | N.D.        | 23.5 |
| 53 |               | <i>Pelodiscus sinensis</i>     | N.D. | N.D. | N.D.        | 19.9 |
| 54 |               | <i>Pelodiscus sinensis</i>     | N.D. | N.D. | N.D.        | 16.1 |
| 55 |               | <i>Pelodiscus sinensis</i>     | N.D. | N.D. | N.D.        | 26.6 |
| 56 |               | <i>Lithobates catesbeiana</i>  | N.D. | N.D. | N.D.        | 18.0 |
| 57 |               | <i>Pelodiscus sinensis</i>     | N.D. | N.D. | N.D.        | 11.6 |
| 58 |               | <i>Lithobates catesbeiana</i>  | N.D. | N.D. | N.D.        | 10.6 |

\* N.D.: the level less than LOQ
